# Supplementary material for: A ‘‘naked-eye’’ colorimetric and ratiometric fluorescence probe for trace hydrazine
Source: Royal Society of Chemistry journal article supplement (doi:10.1039/c9ay00535h), 2019-01-01
Supplement: c9ay00535h1.pdf [file c9ay00535h1.pdf]

## ***Supporting Information***

### **A “naked-eye” colorimetric and ratiometric fluorescence probe for trace hydrazine**

*Cuiyan Wu, Hai Xu, Yaqian Li, Ruihua Xie, Peijuan Li, Xiao Pang, Zile Zhou, Haitao Li and  
Youyu Zhang\**

*<sup>a</sup>Key Laboratory of Chemical Biology and Traditional Chinese Medicine Research (Ministry of  
Education), College of Chemistry and Chemical Engineering, Hunan Normal University,  
Changsha 410081, PR China.*

---

\* Corresponding author: Tel: +86-0731-88865515; Fax: +86-0731-88865515;

E-mail address: [zhangyy@hunnu.edu.cn](mailto:zhangyy@hunnu.edu.cn)

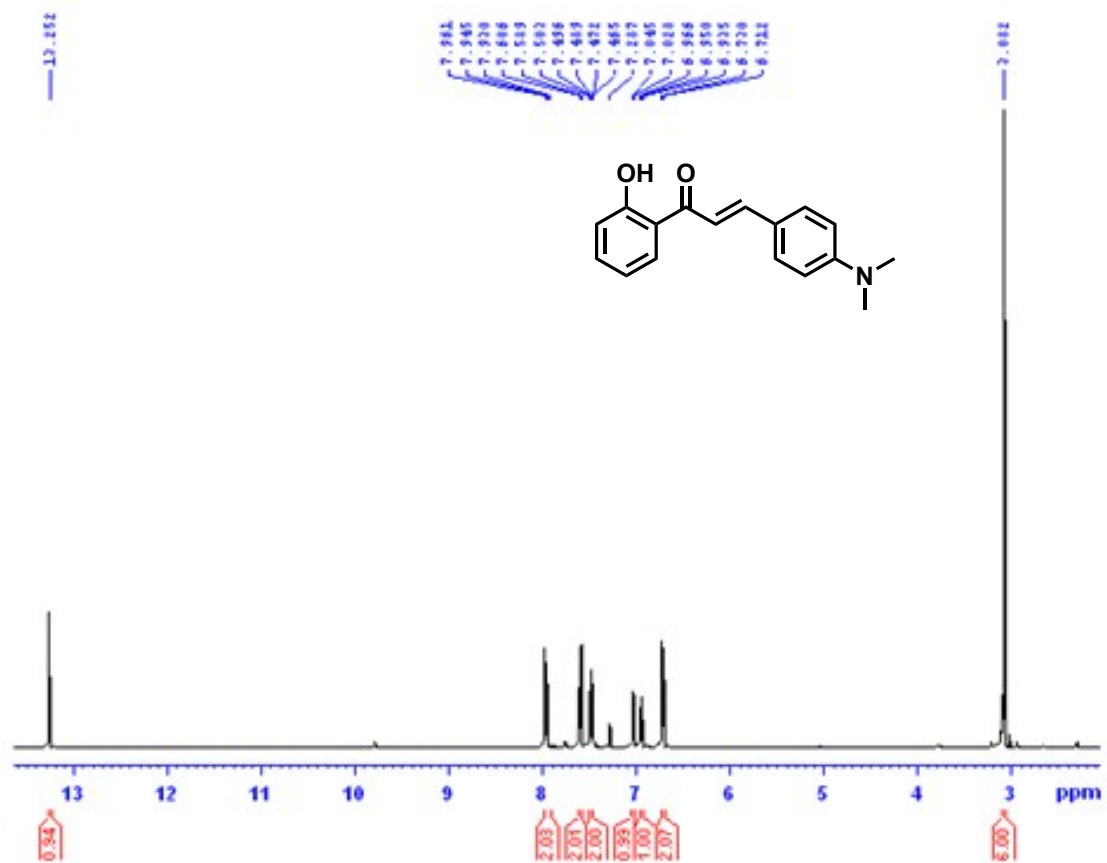

**Fig. S1** <sup>1</sup>H NMR spectrum of Probe **DH** (500 MHz, CDCl<sub>3</sub>)

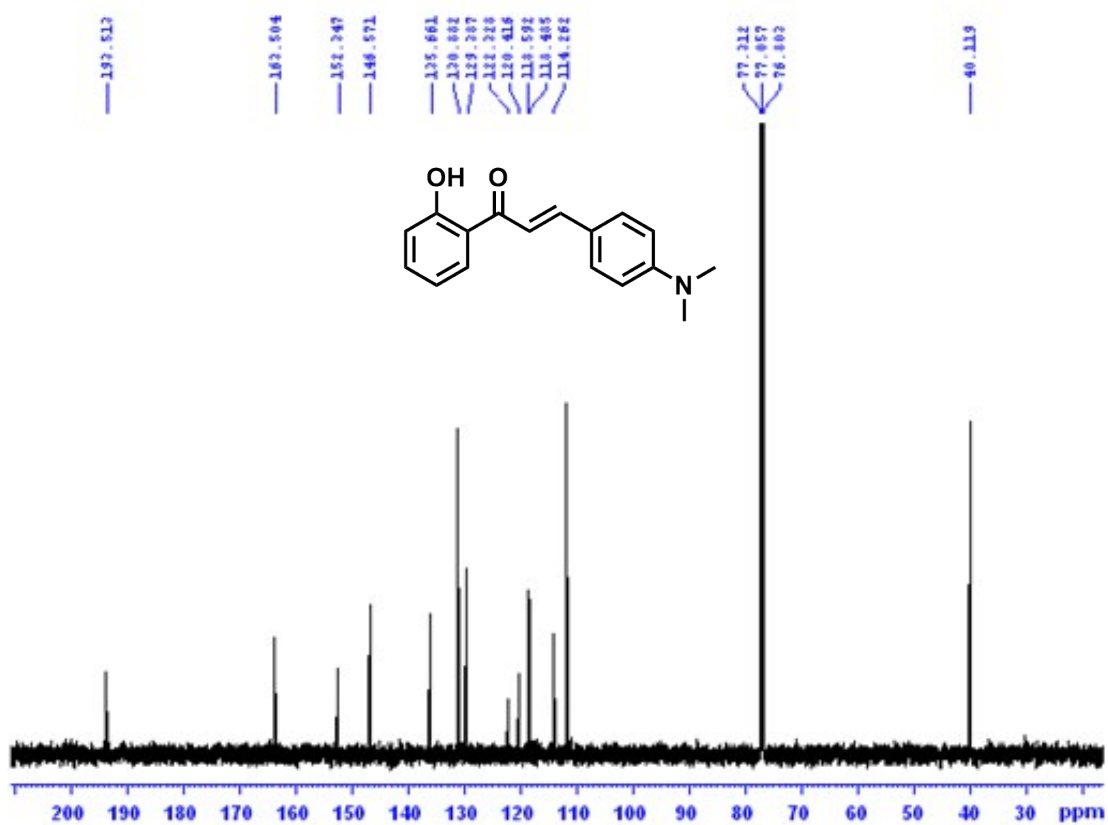

Fig. S2 <sup>13</sup>C NMR spectrum of Probe **DH** (500 MHz, CDCl<sub>3</sub>)

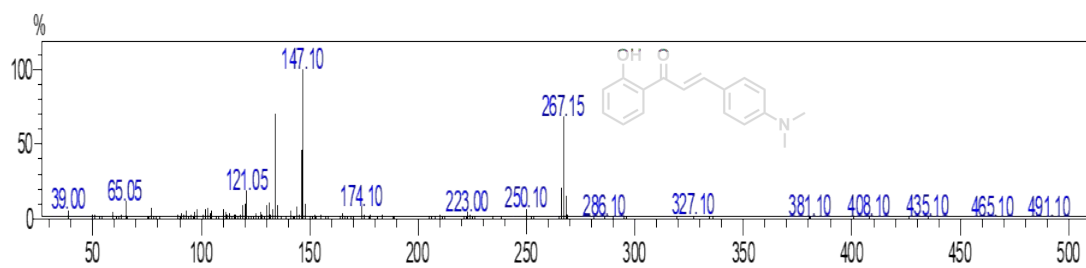

**Fig. S3** MS spectrum of **DH**

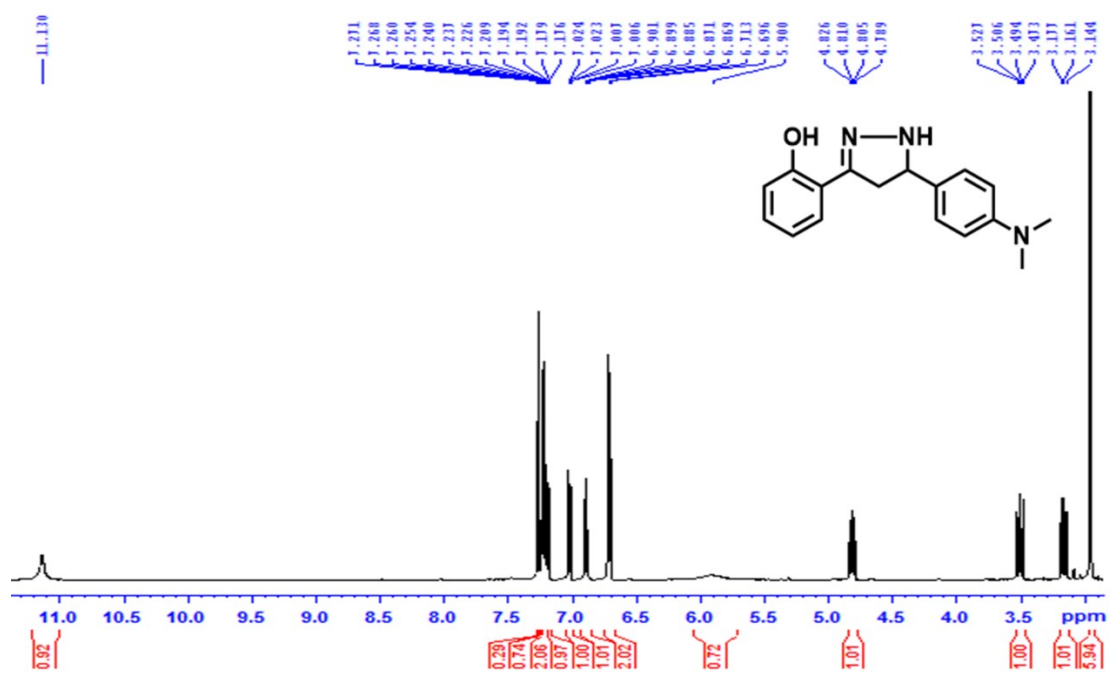

Fig. S4 <sup>1</sup>H NMR spectrum of **DDP** (500 MHz, CDCl<sub>3</sub>)

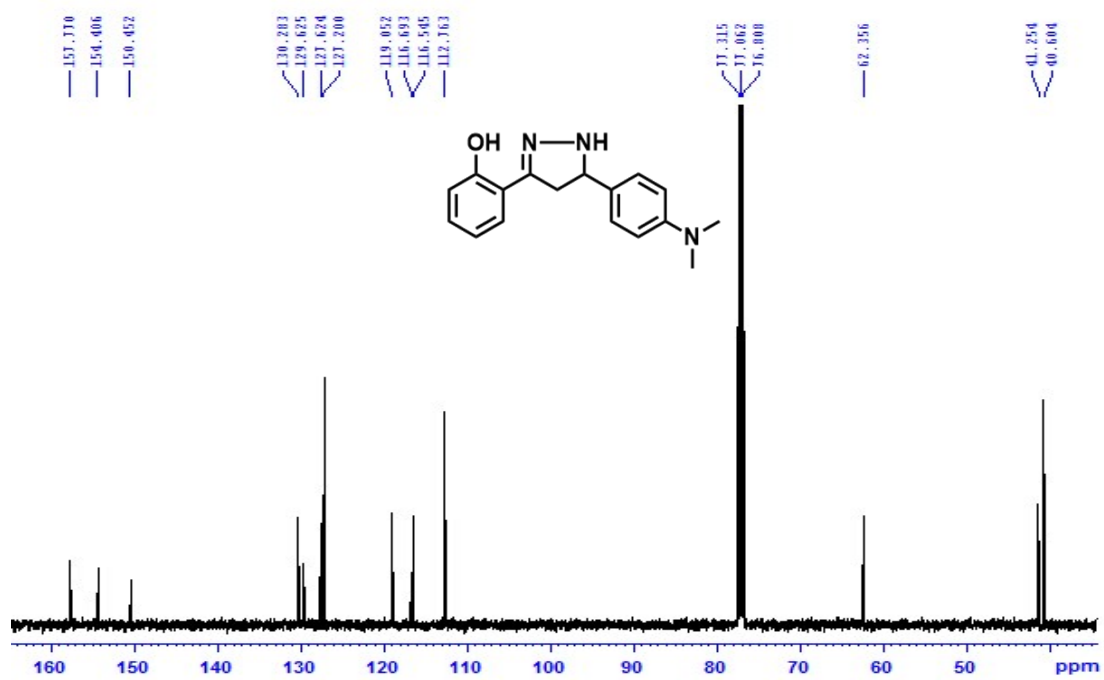

Fig. S5 <sup>13</sup>C NMR spectrum of DDP (500 MHz, CDCl<sub>3</sub>)

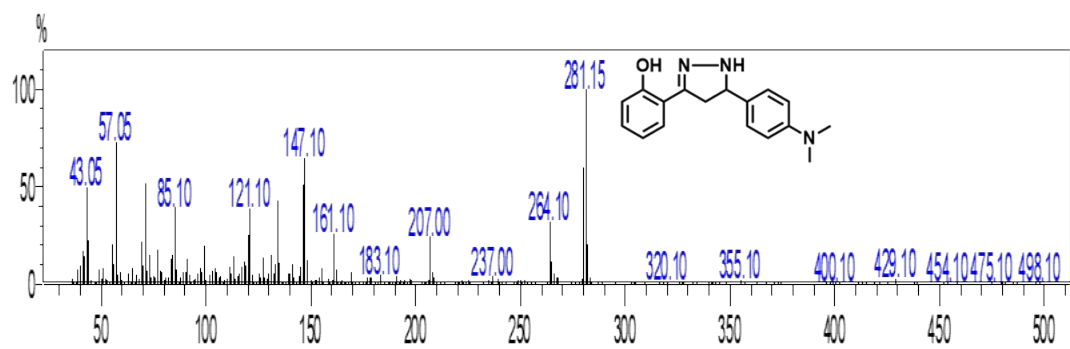

**Fig. S6** MS spectrum of probe **DH**+ N<sub>2</sub>H<sub>4</sub>

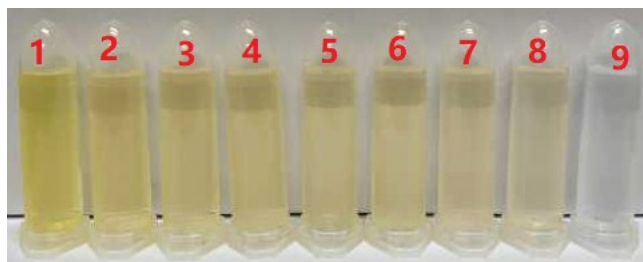

**Fig. S7** Photographs of probe **DH** (10  $\mu\text{M}$ ) solution in the presence of various concentrations of  $\text{N}_2\text{H}_4$  (1. 0  $\mu\text{M}$ , 2. 10  $\mu\text{M}$ , 3. 20  $\mu\text{M}$ , 4. 30  $\mu\text{M}$ , 5. 50  $\mu\text{M}$ , 6. 70  $\mu\text{M}$ , 7. 80  $\mu\text{M}$ , 8. 100  $\mu\text{M}$ , 9. 500  $\mu\text{M}$ ) in PBS buffer (50% DMSO, pH = 7.4).

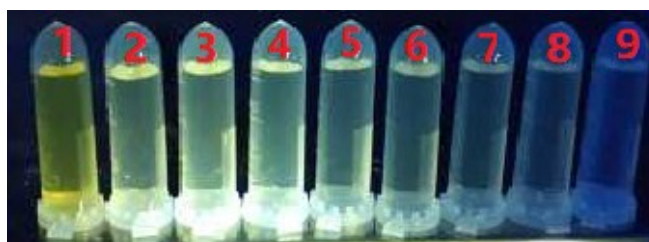

**Fig. S8** Photographs of probe **DH** (10  $\mu\text{M}$ ) solution under 365 nm hand-held UV lamp in the presence of various concentrations of  $\text{N}_2\text{H}_4$  (1. 0  $\mu\text{M}$ , 2. 10  $\mu\text{M}$ , 3. 20  $\mu\text{M}$ , 4. 30  $\mu\text{M}$ , 5. 50  $\mu\text{M}$ , 6. 70  $\mu\text{M}$ , 7. 80  $\mu\text{M}$ , 8. 100  $\mu\text{M}$ , 9. 500  $\mu\text{M}$ ) in PBS buffer (50% DMSO, pH = 7.4).



**Table S1** Comparison of the present probe with the reported N<sub>2</sub>H<sub>4</sub> fluorescent probe.

| Structure                                                                           | Detection limit          | Practical application              | Type of probe                | Rf        |
|-------------------------------------------------------------------------------------|--------------------------|------------------------------------|------------------------------|-----------|
| 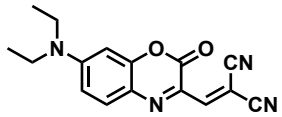   | $0.70 \times 10^{-9}$ M  | Water samples and cellular imaging | Ratiometric                  | [1]       |
|    | $2.46 \times 10^{-6}$ M  | No                                 | Turn on                      | [2]       |
|    | $10 \times 10^{-6}$ M    | Cellular imaging                   | Turn on                      | [3]       |
|   | $2 \times 10^{-5}$ M     | No                                 | Ratiometric                  | [4]       |
|  | $0.147 \times 10^{-6}$ M | Cellular imaging                   | Turn on                      | [5]       |
|  | $8.8 \times 10^{-9}$ M   | Cellular imaging                   | Turn on                      | [6]       |
|  | $1.2 \times 10^{-8}$ M   | Cellular imaging                   | Turn on                      | [7]       |
|  | $7.4 \times 10^{-8}$ M   | Water samples and cellular imaging | Colorimetric and ratiometric | [8]       |
|  | $6.3 \times 10^{-8}$ M   | Water samples                      | Colorimetric and ratiometric | This work |

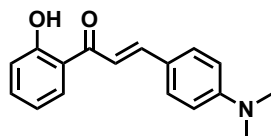

- [1] J. Fan, W. Sun, M. Hu, J. Cao, G. Cheng, H. Dong, K. Song, Y. Liu, S. Sun, X. Peng, An ICT-based ratiometric probe for hydrazine and its application in live cells, *Chemical Communications* 48(65) (2012) 8117-8119.
- [2] M.G. Choi, J. Hwang, J.O. Moon, J. Sung, S.-K. Chang, Hydrazine-Selective Chromogenic and Fluorogenic Probe Based on Levulinated Coumarin, *Organic Letters* 13(19) (2011) 5260-5263.
- [3] B. Liu, Q. Liu, M. Shah, J. Wang, G. Zhang, Y. Pang, Fluorescence monitor of hydrazine in vivo by selective deprotection of flavonoid, *Sensors and Actuators B: Chemical* 202 (2014) 194-200.
- [4] K. Li, H.R. Xu, K.K. Yu, J.T. Hou, X.Q. Yu, A coumarin-based chromogenic and ratiometric probe for hydrazine, *Analytical Methods* 5(11) (2013) 2653-2656.
- [5] J. Zhou, R. Shi, J. Liu, R. Wang, Y. Xu, X. Qian, An ESIPT-based fluorescent probe for sensitive detection of hydrazine in aqueous solution, *Organic & Biomolecular Chemistry* 13(19) (2015) 5344-5348.
- [6] L. Cui, Z. Peng, C. Ji, J. Huang, D. Huang, J. Ma, S. Zhang, X. Qian, Y. Xu, Hydrazine detection in the gas state and aqueous solution based on the Gabriel mechanism and its imaging in living cells, *Chemical Communications* 50(12) (2014) 1485-1487.
- [7] Z. Lu, W. Fan, X. Shi, Y. Lu, C. Fan, Two Distinctly Separated Emission Colorimetric NIR Fluorescent Probe for Fast Hydrazine Detection in Living Cells and Mice upon Independent Excitations, *Analytical Chemistry* 89(18) (2017) 9918-9925.
- [8] H. Xu, B. Gu, Y. Li, Z. Huang, W. Su, X. Duan, P. Yin, H. Li, S. Yao, A highly selective, colorimetric and ratiometric fluorescent probe for  $\text{NH}_2\text{NH}_2$  and its bioimaging, *Talanta* 180 (2018) 199-205.
